# Supplementary material for: The fluorescence properties of tiara like structural thiolated palladium clusters
Source: Royal Society of Chemistry journal article supplement (doi:10.1039/c7dt02836a), 2017-01-01
Supplement: c7dt02836a1.pdf [file c7dt02836a1.pdf]

## Electronic Supplementary Information

### **The fluorescence properties of tiara like structural thiolated palladium clusters**

Jishi Chen, Yanze Pan, Zonghua Wang\* and Peng Zhao

Shandong Sino-Japanese Center for Collaborative Research of Carbon Nanomaterials, College of Chemistry and Chemical Engineering, Laboratory of Fiber Materials and Modern Textiles, The Growing Base for State Key Laboratory, Collaborative Innovation Center for Marine Biomass Fiber, Materials and Textiles of Shandong Province, Qingdao University, Qingdao, Shandong, 266071, China. Email: [wangzonghua@qdu.edu.cn](mailto:wangzonghua@qdu.edu.cn)

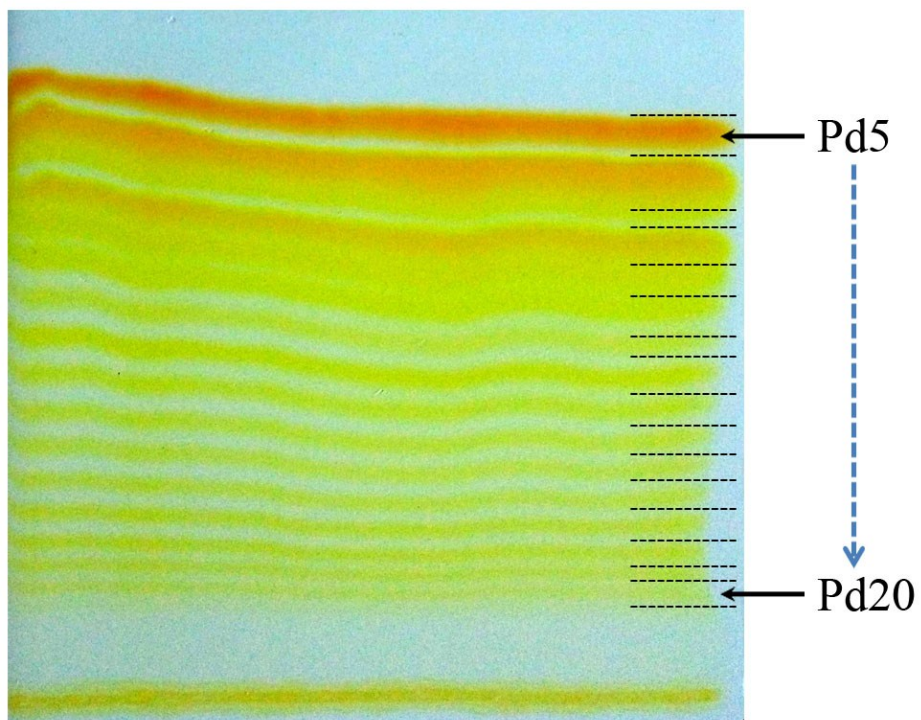

**Figure S1** the photograph of PTLC after isolated Pd<sub>n</sub> nanoclusters with CH<sub>2</sub>Cl<sub>2</sub> and *n*-hexane.

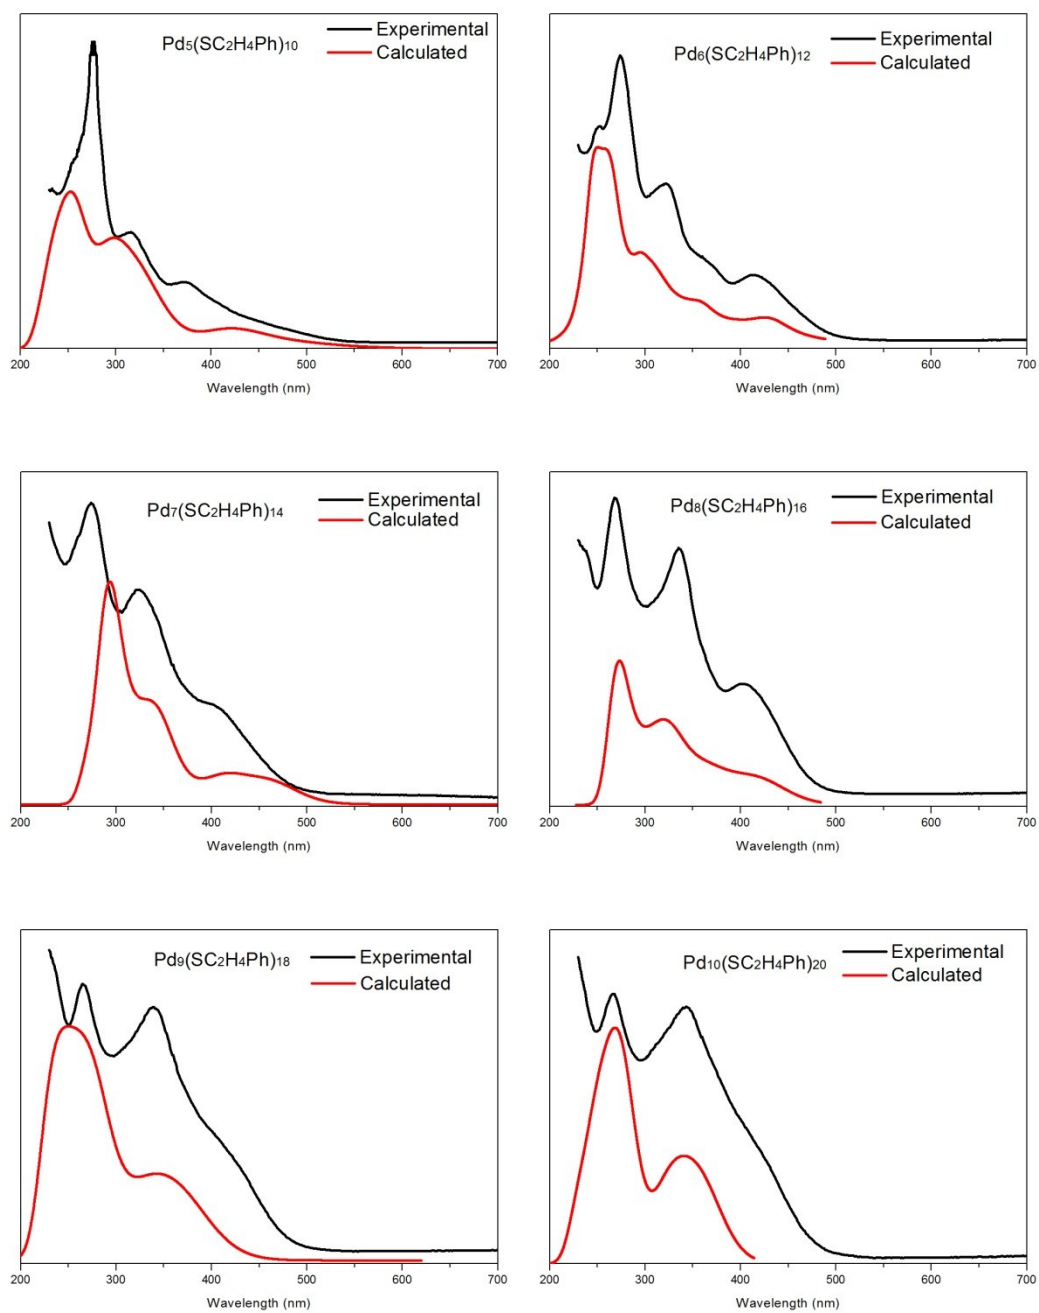

**Figure S2** the experimental and calculated optical spectra of Pd<sub>n</sub>(SR)<sub>2n</sub> (5 ≤ n ≤ 10).

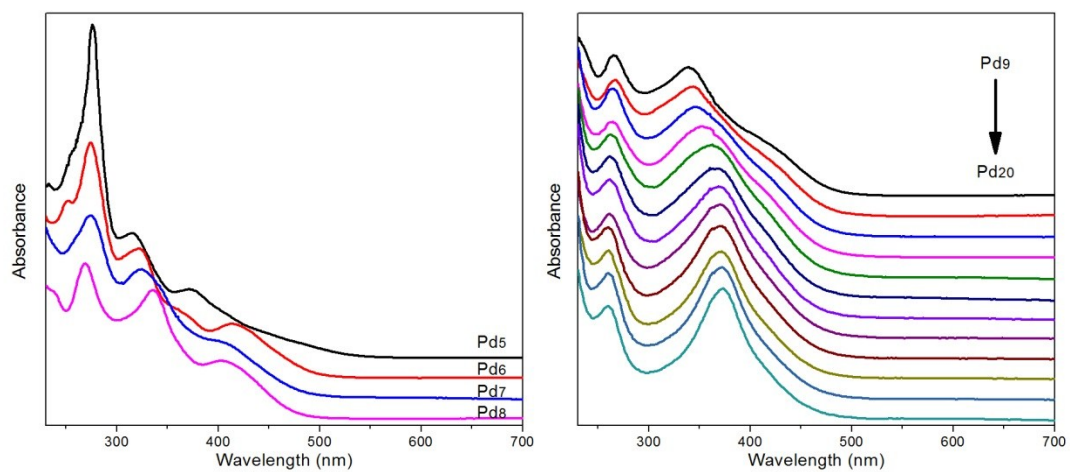

**Figure S3** the UV/vis absorbance spectra of Pd<sub>n</sub> nanoclusters dissolved in CH<sub>2</sub>Cl<sub>2</sub>.

**Table S1** Crystal data and structure refinement for  $[\text{Pd}(\text{SC}_2\text{H}_4\text{Ph})_2]_6 \cdot 2\text{CH}_3\text{COCH}_3$ 

|                                                |                                                                   |
|------------------------------------------------|-------------------------------------------------------------------|
| Empirical formula                              | $\text{C}_{51}\text{H}_{60}\text{OPd}_3\text{S}_6$                |
| Formula weight                                 | 1200.55                                                           |
| Temperature/K                                  | 289(2)                                                            |
| Crystal system                                 | triclinic                                                         |
| Space group                                    | P-1                                                               |
| a/Å                                            | 11.3964(2)                                                        |
| b/Å                                            | 12.8541(4)                                                        |
| c/Å                                            | 18.4749(6)                                                        |
| $\alpha$ /°                                    | 104.222(3)                                                        |
| $\beta$ /°                                     | 99.280(2)                                                         |
| $\gamma$ /°                                    | 90.295(2)                                                         |
| Volume/Å <sup>3</sup>                          | 2586.28(13)                                                       |
| Z                                              | 2                                                                 |
| $\rho_{\text{calc}}/\text{g}/\text{cm}^3$      | 1.542                                                             |
| $\mu/\text{mm}^{-1}$                           | 10.853                                                            |
| F(000)                                         | 1216.0                                                            |
| Crystal size/mm <sup>3</sup>                   | 0.320 × 0.310 × 0.240                                             |
| Radiation                                      | Cu K $\alpha$ ( $\lambda$ = 1.54184 Å)                            |
| 2 $\theta$ range for data collection/°         | 7.87 to 139.82                                                    |
| Index ranges                                   | -13 ≤ h ≤ 8, -15 ≤ k ≤ 15,<br>-22 ≤ l ≤ 22                        |
| Reflections collected                          | 20139                                                             |
| Independent reflections                        | 9547 [ $R_{\text{int}}$ = 0.0482, $R_{\text{sigma}}$ =<br>0.0541] |
| Data/restraints/parameters                     | 9547/26/550                                                       |
| Goodness-of-fit on F <sup>2</sup>              | 1.068                                                             |
| Final R indexes [ $I > 2\sigma(I)$ ]           | $R_1 = 0.0451$ , $wR_2 = 0.1225$                                  |
| Final R indexes [all data]                     | $R_1 = 0.0474$ , $wR_2 = 0.1258$                                  |
| Largest diff. peak/hole / e<br>Å <sup>-3</sup> | 1.51/-1.42                                                        |
